# Supplementary material
Source: Research Square preprint supplement (doi:10.21203/rs.3.rs-9078543/v1)
Supplement: Supplementary file 1 [file 3479907517151545aadf6bb7.docx]

Functional identification of the C-terminal domain of rhCNB

Ziwei Zhu1#, Li Tong1#, Hongcui Ma1, Huinan Yang2, Jinju Yang2*, Qun Wei1*

1Gene Engineering and Biotechnology Beijing Key Laboratory, Department of Biochemistry and Molecular Biology, Beijing Normal University，Beijing, 100875, P. R. of China.

2National Key Laboratory of Biochemical Engineering, Institute of Process Engineering, Chinese Academy of Sciences, Beijing 100190, China;

# Hongcui Ma and Li Tong contributed equally.

***Correspondence should be addressed to:**

**Professor Qun Wei,**

Department of Biochemistry and Molecular Biology

Beijing Normal University

Beijing Key Laboratory, Beijing 100875, People’s Republic of China

Tel & Fax: 86-10-58807365

1. mail: [weiq@bnu.edu.cn](mailto:weiq@bnu.edu.cn)；

**Associate Professor Jinju Yang**

National Key Laboratory of Biochemical Engineering, Institute of Process Engineering, Chinese Academy of Sciences, Beijing 100190, China;

Tel & Fax: 86-10-82545075

E-mail: yangjinju@ipe.ac.cn

1. **Supplementary Figures**

**
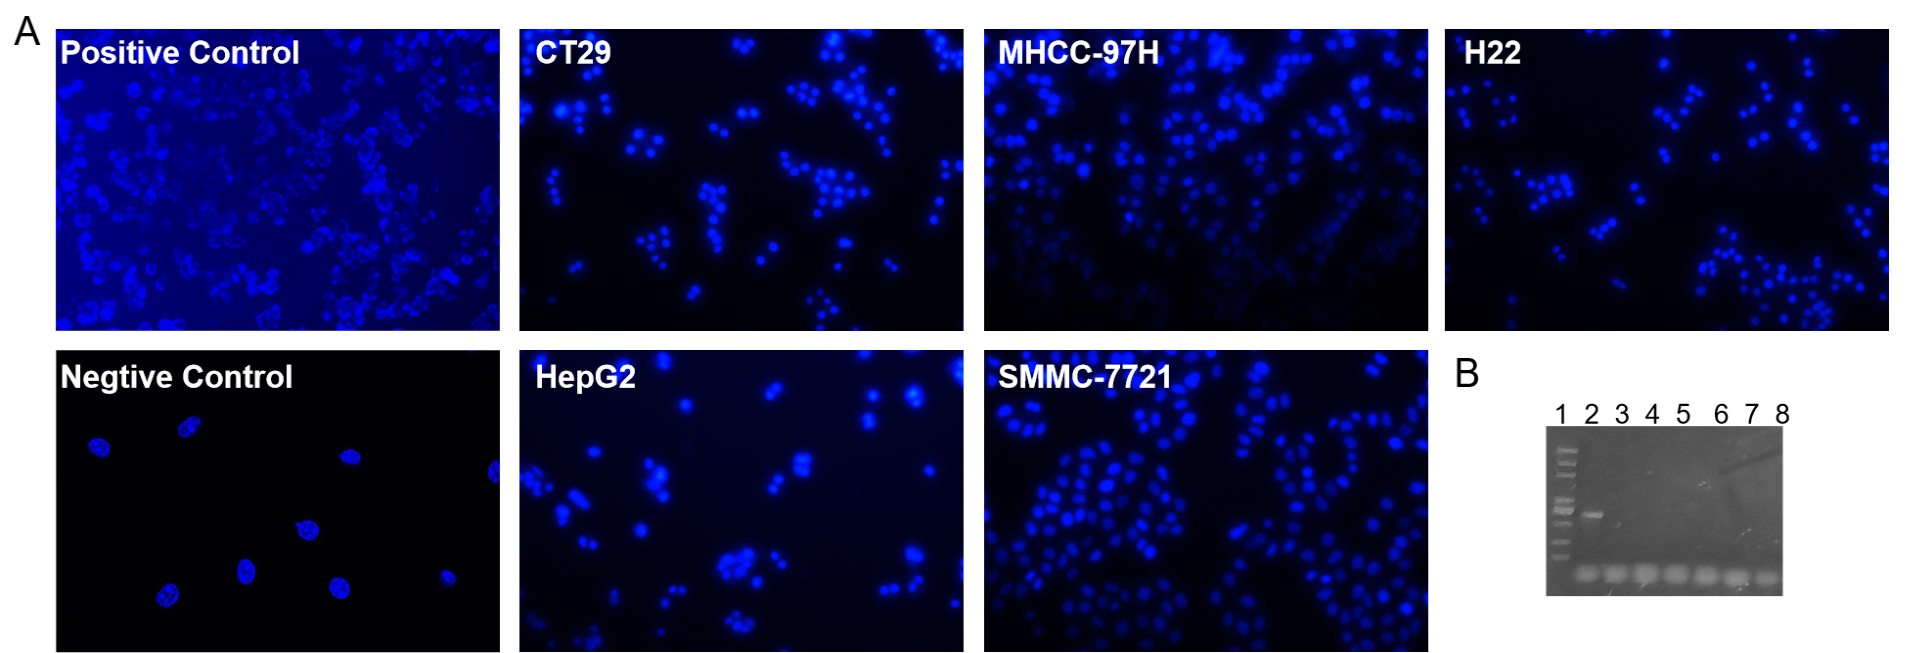
**

**Figure S1. Identification of mycoplasma contamination in the cell lines used.** (A) DAPI fluorescence staining of (ⅰ) positive control cell line, (ⅱ) CT29, (ⅲ) MHCC-97H, (ⅳ) H22, (ⅴ) negative control cell line, (ⅵ) HepG2, and (ⅶ) SMMC-7721. (B) PCR-based identification of mycoplasma in the cell lines. Lane 1: DNA ladder (5000, 3000, 2000, 1500, 750, 500, 250, 100 bp); Lane 2: positive control cell line; Lane 3: negative control cell line; Lanes 4–8: CT29, MHCC-97H, H22, HepG2, and SMMC-7721, respectively.


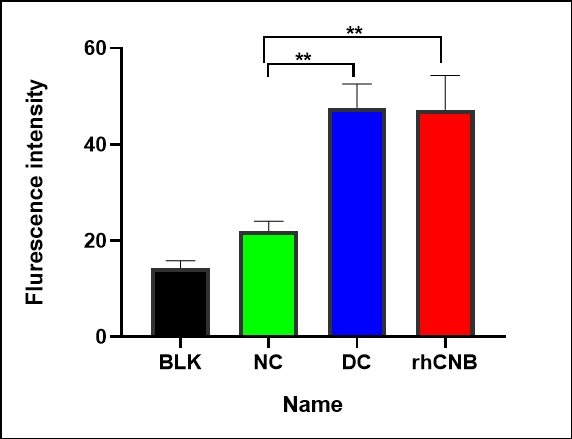


**Figure S2. Fluorescence intensity quantification from the images of DC or rhCNB’ cellular uptake.** The images were analyzed using ImageJ software. Data are presented as mean ± SD (n=3 independent experiments; **P < 0.01).

1. **Original Gel and Blot Images**


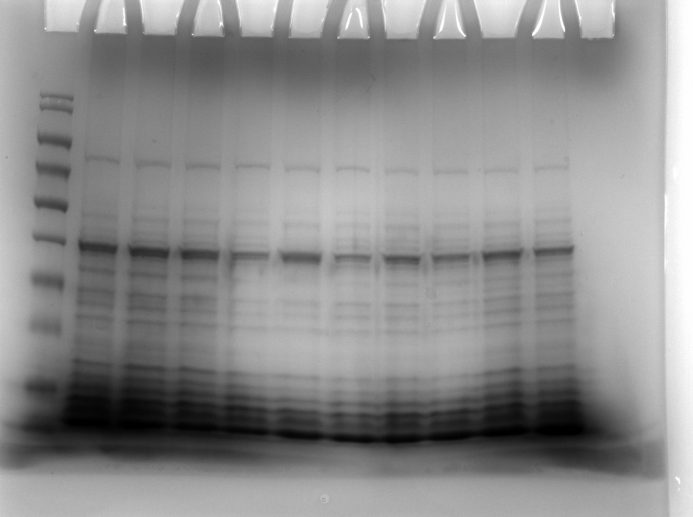


1 2 3 4 5 6 7 8 9 10 11 12

**Figure S3. Original uncropped gel for Figure 1c.**

Lane1-9 were croped and presented in Figure 1c.


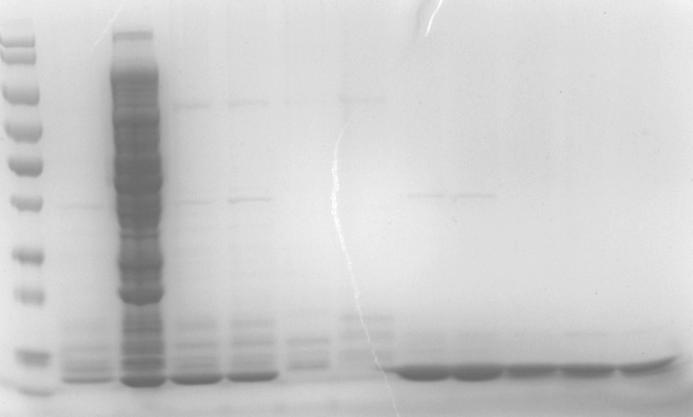


1 2 3 4 5 6 7 8 9 10 11 12

**Figure S4. Original uncropped gel for Figure 1f.**

Lane1-12 were presented in Figure 1f.

1 2 3 4 5 6 7 8 9 10


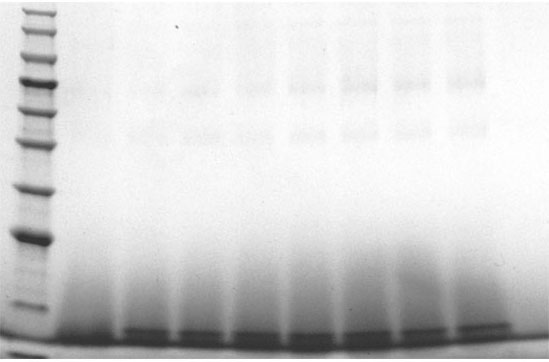


**Figure S5. Original blot for Figure 1d.**

Lane1-9 was presented in Figure 1d.


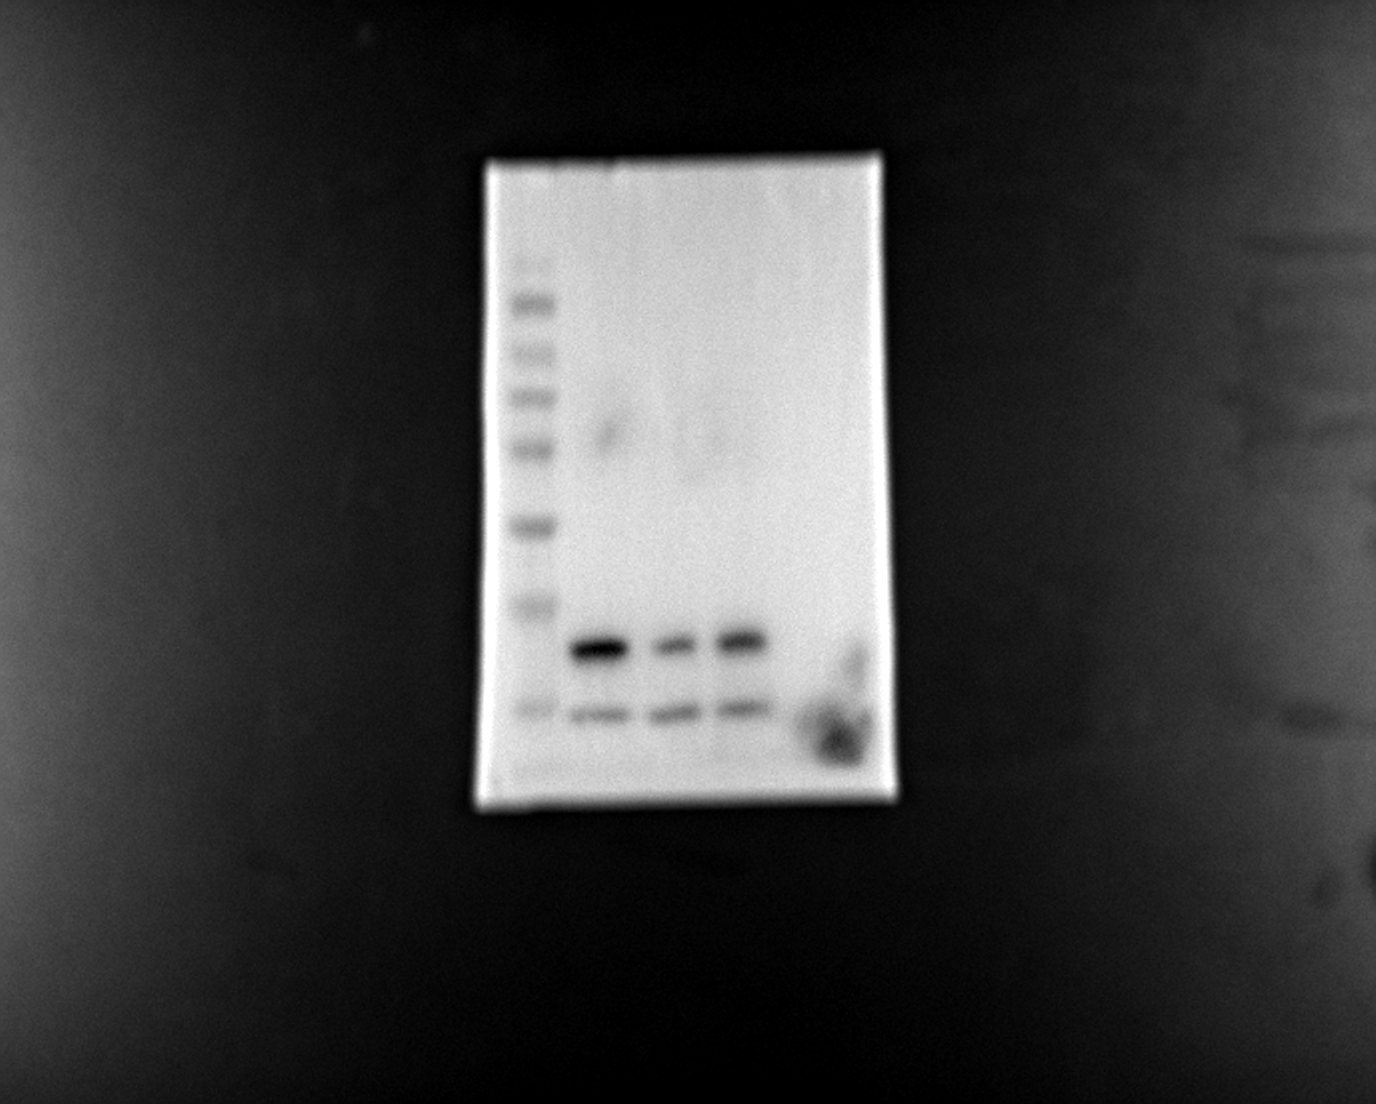


1 2 3 4 5

**Figure S6. Original blot for Figure 1h.**

Lane1-2 was presented in Figure 1h.
